# Supplementary material for: Captivity systematically alters the composition yet not the diversity of vertebrate gut microbiomes
Source: Research Square preprint supplement (doi:10.21203/rs.3.rs-226149/v1), 2021-02-26
Supplement: Supplementary file 2 [file 0c3f0fbdfd8a44efcd40c589.xlsx]

## Sheet: Supplementary Dataset
#	Code	Scientific name	Order	Total	Wild	Captive	Enclosure type	Diet	Antibiotic treatment	Reference
1	VAHI	Valencia hispanica	Cyprinodontiformes	29	16	13	Outdoor pool	Natural	No	Nyholm et al. in prep
2	APIB	Aphanius iberus	Cyprinodontiformes	23	11	12	Outdoor pool	Natural	No	Nyholm et al. in prep
3	RADY	Rana dybowskii	Anura	24	12	12	Greenhouse	Natural	No	Q. Tong, et al., Effects of Captivity and Season on the Gut Microbiota of the Brown Frog (Rana dybowskii). Front. Microbiol. 10, 1912 (2019).
4	CHMY	Chelonia mydas	Testudines	15	8	7	Individual PVC tank	No information	No	P. Campos, M. Guivernau, F. X. Prenafeta-Boldú, L. Cardona, Fast acquisition of a polysaccharide fermenting gut microbiome by juvenile green turtles Chelonia mydas after settlement in coastal habitats. Microbiome 6, 69 (2018).
5	ALGI	Aldabrachelys gigantea	Testudines	12	6	6	Naturally decorated	Natural	No	C. Sandri, et al., Fecal Microbiota Characterization of Seychelles Giant Tortoises (Aldabrachelys gigantea) Living in Both Wild and Controlled Environments. Front. Microbiol. 11, 569249 (2020).
6	SHCR	Shinisaurus crocodilurus	Squamata	27	16	11	No information	Natural	No	G.-S. Tang, et al., Captivity Influences Gut Microbiota in Crocodile Lizards (Shinisaurus crocodilurus). Front. Microbiol. 11, 550 (2020).
7	RHBR	Rhinopithecus brelichi	Primates	19	9	10	No information	Natural	No information	V. L. Hale, C. L. Tan, K. Niu, Y. Yang, Gut microbiota in wild and captive Guizhou snub‐nosed monkeys, Rhinopithecus brelichi. American journal of (2019).
8	PYNE	Pygathrix nemaeus	Primates	54	27	27	No information	Natural and different within facilities	Some individuals	J. B. Clayton, et al., Captivity humanizes the primate microbiome. Proc. Natl. Acad. Sci. U. S. A. 113, 10376–10381 (2016).
9	PAAN	Papio anubis / ursinus	Primates	18	9	9	No information	Pellets	Yes	P. Tsukayama, et al., Characterization of Wild and Captive Baboon Gut Microbiota and Their Antibiotic Resistomes. mSystems 3 (2018).
10	PATR	Pan troglodytes	Primates	11	5	6	Naturally decorated	Natural	No information	V. Narat, K. R. Amato, N. Ranger, M. Salmona, A multi-disciplinary comparison of great ape gut microbiota in a central African forest and European zoo. Sci. Rep. (2020).
11	GOGO	Gorilla gorilla	Primates	12	6	6	Naturally decorated	Natural	No information	V. Narat, K. R. Amato, N. Ranger, M. Salmona, A multi-disciplinary comparison of great ape gut microbiota in a central African forest and European zoo. Sci. Rep. (2020).
12	PEMA	Peromyscus maniculatus	Rodentia	63	32	31	Naturally decorated	Pellets	No	E. Schmidt, N. Mykytczuk, A. I. Schulte-Hostedde, Effects of the captive and wild environment on diversity of the gut microbiome of deer mice (Peromyscus maniculatus). ISME J. 13, 1293–1305 (2019).
13	PELE	Peromyscus leucopus	Rodentia	35	17	18	Naturally decorated	Natural & pellets	No	P. van Leeuwen, N. Mykytczuk, G. F. Mastromonaco, A. I. Schulte-Hostedde, Effects of captivity, diet, and relocation on the gut bacterial communities of white-footed mice. Ecol. Evol. (2020).
14	TUTR	Tursiops truncatus	Cetacea	23	10	12	No information	Natural	No	E. M. Bik, et al., Marine mammals harbor unique microbiotas shaped by and yet distinct from the sea. Nat. Commun. 7, 10516 (2016).
15	MOCH	Moschus chrysogaster	Artiodactyla	27	14	13	Farm	Natural	No information	Y. Sun, et al., Gut Microbiota of Wild and Captive Alpine Musk Deer (Moschus chrysogaster). Front. Microbiol. 10, 3156 (2019).
16	BOGA	Bos gaurus	Artiodactyla	19	9	10	No information	No information	No information	V. R. Prabhu, Wasimuddin, R. Kamalakkannan, M. S. Arjun, M. Nagarajan, Consequences of Domestication on Gut Microbiome: A Comparative Study Between Wild Gaur and Domestic Mithun. Front. Microbiol. 11, 133 (2020).
17	ELDA	Elaphurus davidianus	Artiodactyla	12	6	6	Natural	Natural	No	C.-H. Sun, H.-Y. Liu, B. Liu, B.-D. Yuan, C.-H. Lu, Analysis of the Gut Microbiome of Wild and Captive Père David’s Deer. Front. Microbiol. 10, 2331 (2019)
18	CENI	Cervus nippon	Artiodactyla	19	7	12	Farm industry	No information	No	Y. Guan, et al., Correction to: Comparison of the gut microbiota composition between wild and captive sika deer (Cervus nippon hortulorum) from feces by high-throughput sequencing. AMB Express 8, 15 (2018).
19	EQKI	Equus kiang	Artiodactyla	39	18	21	No information	No information	No	H. Gao, et al., Comparison of the gut microbiota composition between the wild and captive Tibetan wild ass (Equus kiang). J. Appl. Microbiol. 126, 1869–1878 (2019).
20	AIME	Ailuropoda melanoleuca	Carnivora	61	30	31	No information	Natural	No	W. Guo, et al., Comparative Study of Gut Microbiota in Wild and Captive Giant Pandas (Ailuropoda melanoleuca). Genes 10 (2019).
21	PATI	Panthera tigris	Carnivora	26	13	13	No information	Natural	No	Y. Ning, et al., Comparative Analysis of Microbial Community Structure and Function in the Gut of Wild and Captive Amur Tiger. Front. Microbiol. 11, 1665 (2020).
22	MYTR	Myrmecophaga tridactyla	Pilosa	11	6	5	Different within zoos	Different within zoos	No	F. Delsuc, et al., Convergence of gut microbiomes in myrmecophagous mammals. Mol. Ecol. 23, 1301–1317 (2014).
23	SAHA1	Sarcophilus harrisii	Dasyuroorphia	21	10	11	No information	Natural	No information	Y. Cheng, et al., The Tasmanian devil microbiome—implications for conservation and management. Microbiome 3, 76 (2015).
24	SAHA2	Sarcophilus harrisii	Dasyuroorphia	12	6	6	Different within zoos	Natural	No information	R. Chong, et al., Looking like the locals - gut microbiome changes post-release in an endangered species. Animal Microbiome 1, 8 (2019).
25	LALT	Lasiorhinus latifrons	Diprotodontia	33	19	14	Naturally decorated	Different within facilities	No information	R. Eisenhofer, K. M. Helgen, D. Taggart, Signatures of landscape and captivity in the gut microbiota of Southern Hairy-nosed Wombats (Lasiorhinus latifrons). Animal Microbiome 3, 4 (2021).
